# Supplementary material for: Highly efficient doping of titanium dioxide with sulfur using disulfide-linked macrocycles for hydrogen production under visible light
Source: Royal Society of Chemistry journal article supplement (doi:10.1039/d2gc00304j), 2022-01-01
Supplement: d2gc00304j1.pdf [file d2gc00304j1.pdf]

## Supporting Information

# Highly Efficient Doping Titanium Dioxide with Sulfur using Disulfide-linked Macrocycles for Hydrogen Production under Visible Light

Meng Zhou,<sup>a</sup> Xin Zhong,<sup>a</sup> Dan Wei,<sup>a</sup> Kang Yang,<sup>a</sup> Yifan Chen,<sup>a</sup> Chunman Jia,<sup>a,b,\*</sup> Jianwei Li<sup>a,b,c,\*</sup>

<sup>a</sup> Hainan Provincial Key Laboratory of Fine Chem, School of Chemical Engineering and Technology, <sup>b</sup> One Health Institute, Hainan University, Haikou 570228, China.

<sup>c</sup> MediCity Research Laboratory, University of Turku, Tykistökatu 6, Turku 20520, Finland.

\* Corresponding authors: [jianwei.li@utu.fi](mailto:jianwei.li@utu.fi); [jiachunman@hainanu.edu.cn](mailto:jiachunman@hainanu.edu.cn)

## Contents

|           |                                                                                                                            |    |
|-----------|----------------------------------------------------------------------------------------------------------------------------|----|
| Fig. S1   | Synthetic routes to the disulfide macrocycle (DSM).....                                                                    | 2  |
| Fig. S2   | <sup>1</sup> H NMR of 5-butoxybenzene-1,3-diol in CDCl <sub>3</sub> .....                                                  | 2  |
| Fig. S3   | <sup>13</sup> C NMR of 5-butoxybenzene-1,3-diol in CDCl <sub>3</sub> .....                                                 | 3  |
| Fig. S4   | High resolution mass spectrum of 5-butoxybenzene-1,3-diol. ....                                                            | 3  |
| Fig. S5   | <sup>1</sup> H NMR of O,O'-(5-butoxy-1,3-phenylene) bis (dimethylcarbamothioate) in CDCl <sub>3</sub> . ....               | 3  |
| Fig. S6   | <sup>13</sup> C NMR of O,O'-(5-butoxy-1,3-phenylene) bis (dimethylcarbamothioate) in CDCl <sub>3</sub> . ....              | 4  |
| Fig. S7   | High resolution mass spectrum of O,O'-(5-butoxy-1,3-phenylene) bis (dimethylcarbamothioate). ....                          | 4  |
| Fig. S8   | <sup>1</sup> H NMR of S,S'-(5-butoxy-1,3-phenylene) bis(dimethylcarbamothioate) in CDCl <sub>3</sub> .....                 | 4  |
| Fig. S9   | <sup>13</sup> C NMR of S,S'-(5-butoxy-1,3-phenylene) bis(dimethylcarbamothioate) in CDCl <sub>3</sub> .....                | 5  |
| Fig. S10  | High resolution mass spectrum of S,S'-(5-butoxy-1,3-phenylene) bis(dimethylcarbamothioate). ....                           | 5  |
| Fig. S11  | <sup>1</sup> H NMR of 5-butoxybenzene-1,3-dithiol in CDCl <sub>3</sub> .....                                               | 5  |
| Fig. S12  | <sup>13</sup> C NMR of 5-butoxybenzene-1,3-dithiol in CDCl <sub>3</sub> .....                                              | 6  |
| Fig. S13  | High resolution mass spectra of 5-butoxybenzene-1,3-dithiol. ....                                                          | 6  |
| Fig. S14  | <sup>1</sup> H NMR of the disulfide macrocycle (DSM) in CDCl <sub>3</sub> . ....                                           | 6  |
| Fig. S15  | <sup>13</sup> C NMR of the disulfide macrocycle (DSM) in CDCl <sub>3</sub> . ....                                          | 7  |
| Fig. S16  | High resolution mass spectrum of the disulfide macrocycle (DSM).....                                                       | 7  |
| Fig. S17  | Synthesis flow chart of DSM-TiO <sub>2</sub> system materials. ....                                                        | 7  |
| Fig. S18  | SEM、EDX and elemental mapping of DSM-TiO <sub>2</sub> (5.0 wt%).....                                                       | 8  |
| Fig. S19  | The EDX analysis of the Pt/DSM-TiO <sub>2</sub> (5.0 wt%).....                                                             | 8  |
| Fig. S20  | The physical absorption and desorption measured of native TiO <sub>2</sub> and DSM-TiO <sub>2</sub> (2.5/5.0/7.5 wt%)..... | 9  |
| Fig. S21  | Pore distribution of native TiO <sub>2</sub> and DSM-TiO <sub>2</sub> (2.5/5.0/7.5 wt%).....                               | 9  |
| Fig. S22  | Thermogravimetric analysis of DSM and DSM-TiO <sub>2</sub> (7.5 wt%) materials. ....                                       | 10 |
| Fig. S24  | X-ray photoelectron spectra of DSM-TiO <sub>2</sub> (5.0 wt%).....                                                         | 11 |
| Fig. S25  | The solid UV-vis spectrum of DSM-TiO <sub>2</sub> (2.5\5.0\7.5 wt%).....                                                   | 12 |
| Fig. S26  | Hydrogen production performance of DSM-TiO <sub>2</sub> (5.0 wt%) calcined at different temperatures.....                  | 12 |
| Fig. S27  | Hydrogen production performance of native TiO <sub>2</sub> and DSM-TiO <sub>2</sub> (2.5/5.0/7.5 wt%) .....                | 13 |
| Fig. S28  | Hydrogen production performance of DSM-TiO <sub>2</sub> with different metal. ....                                         | 13 |
| Fig. S29  | XPS and XRD maps after the 50 hours cycle stability experiment of Pt(0.3 wt%)/DSM-TiO <sub>2</sub> (5.0 wt%)....           | 14 |
| Fig. S30  | Solid steady state fluorescence spectrum of native TiO <sub>2</sub> and DSM-TiO <sub>2</sub> (2.5/5.0/7.5 wt%).....        | 15 |
| Fig. S31  | Density Functional theory (DFT) computes the structural model.....                                                         | 15 |
| Table. S1 | Pt and S contents in DSM-TiO <sub>2</sub> (5.0 wt%).....                                                                   | 16 |
| Table. S2 | Specific surface area、pore size and pore volume of native TiO <sub>2</sub> and DSM-TiO <sub>2</sub> materials .....        | 16 |
| Table. S3 | The apparent quantum yield of DSM-TiO <sub>2</sub> (5.0 wt%) materials.....                                                | 16 |

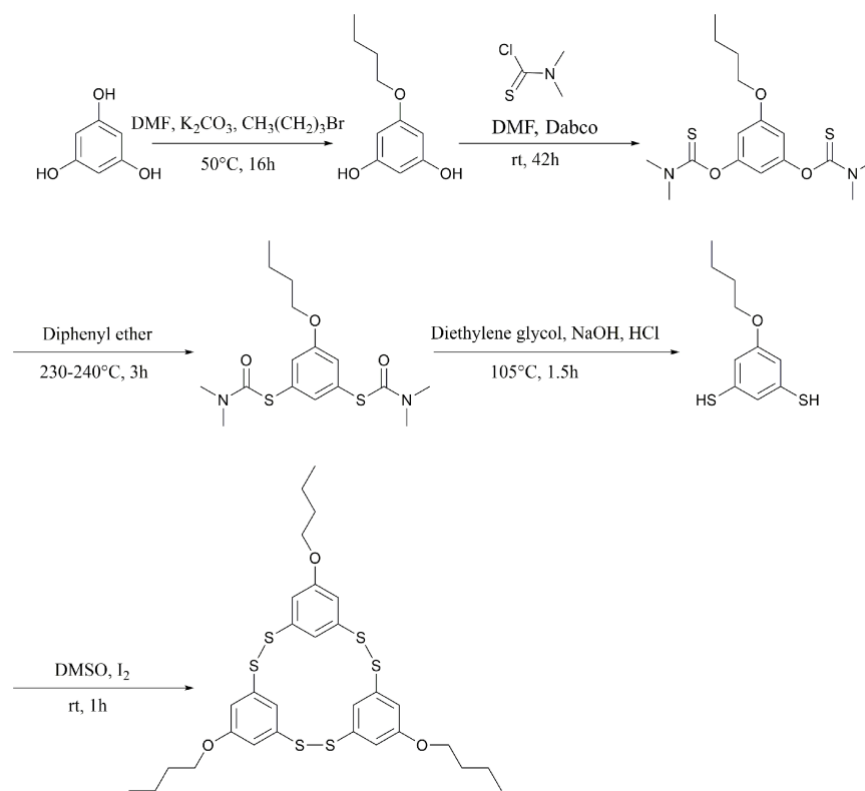

Fig. S1 Synthetic routes to the disulfide macrocycle (DSM).

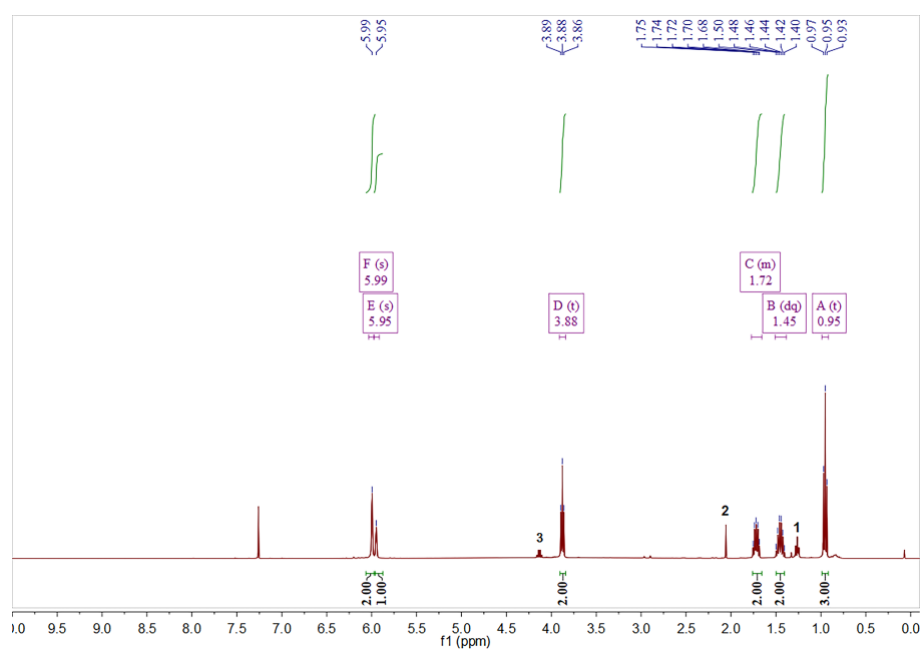

Fig. S2  $^1\text{H}$  NMR of 5-butoxybenzene-1,3-diol in  $\text{CDCl}_3$ , in which the peaks 1, 2, 3 are assigned to the residual solvent ethyl acetate.

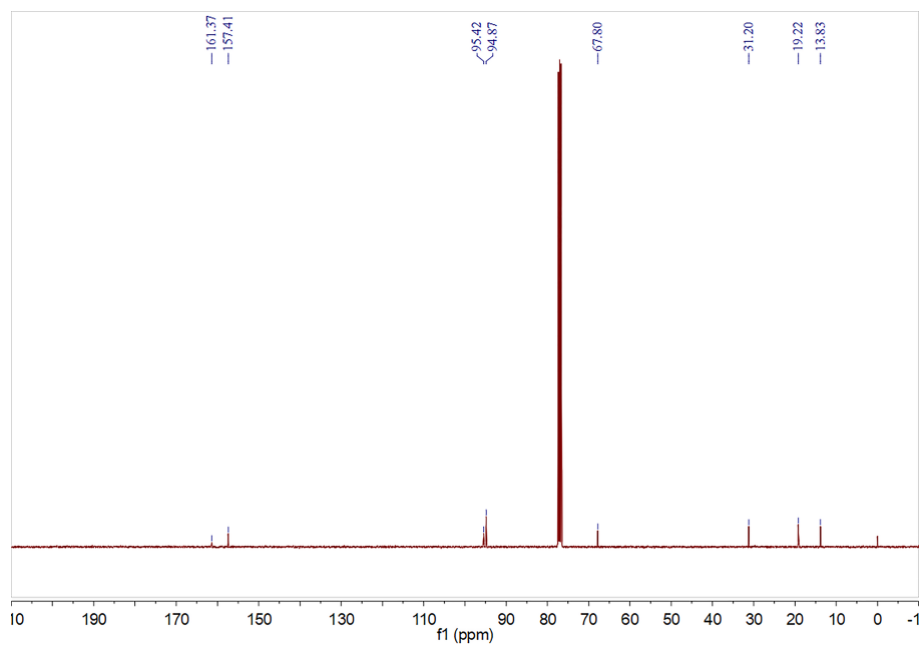

Fig. S3  $^{13}\text{C}$  NMR of 5-butoxybenzene-1,3-diol in  $\text{CDCl}_3$ .

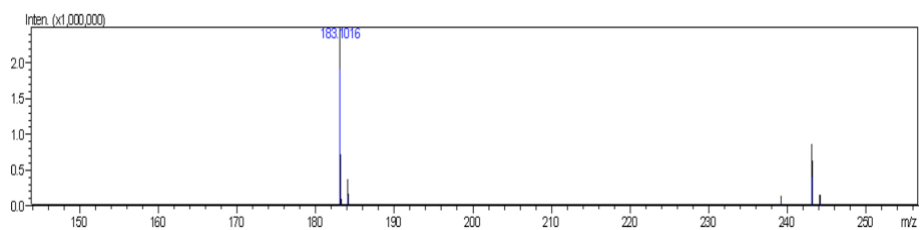

Fig. S4 High resolution mass spectrum of 5-butoxybenzene-1,3-diol.

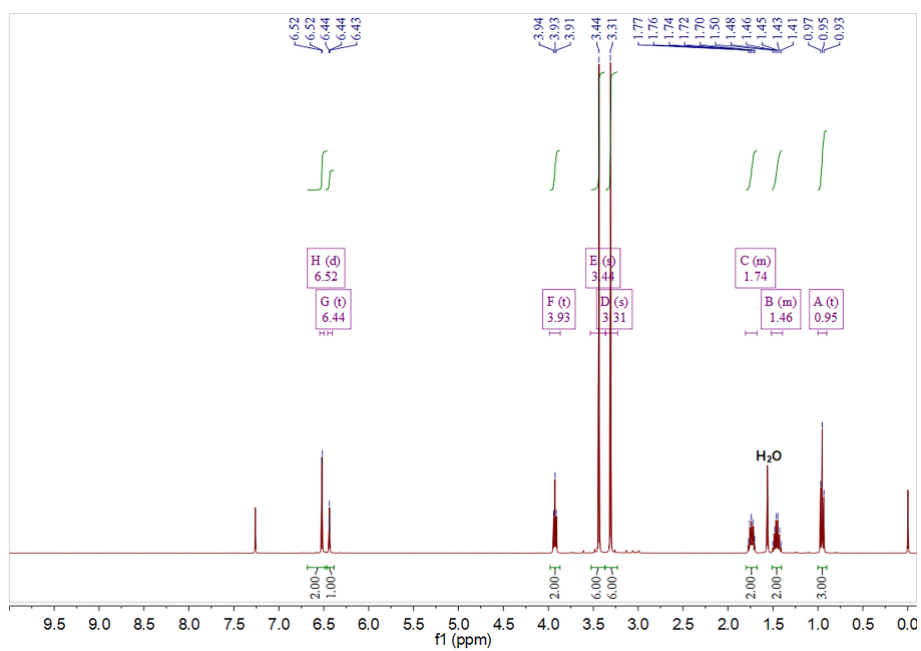

Fig. S5  $^1\text{H}$  NMR of  $\text{O,O}'$ -(5-butoxy-1,3-phenylene) bis(dimethylcarbamothioate) in  $\text{CDCl}_3$ .

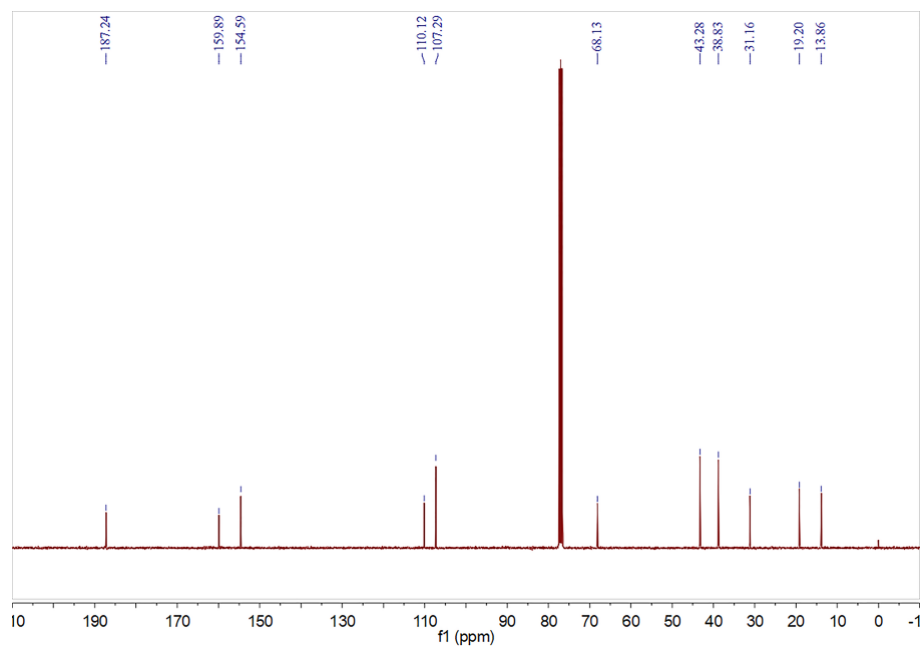

Fig. S6  $^{13}\text{C}$  NMR of O,O'-(5-butoxy-1,3-phenylene) bis(dimethylcarbamothioate) in  $\text{CDCl}_3$ .

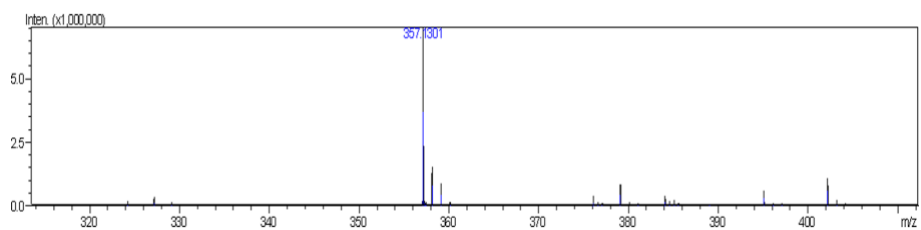

Fig. S7 High resolution mass spectrum of O,O'-(5-butoxy-1,3-phenylene) bis(dimethylcarbamothioate).

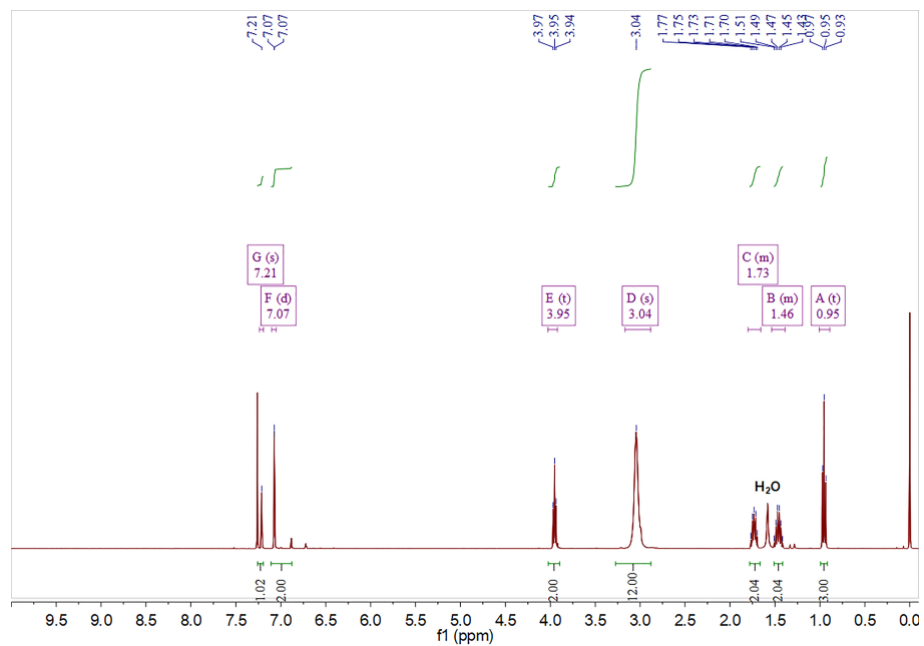

Fig. S8  $^1\text{H}$  NMR of S,S'-(5-butoxy-1,3-phenylene) bis(dimethylcarbamothioate) in  $\text{CDCl}_3$ .

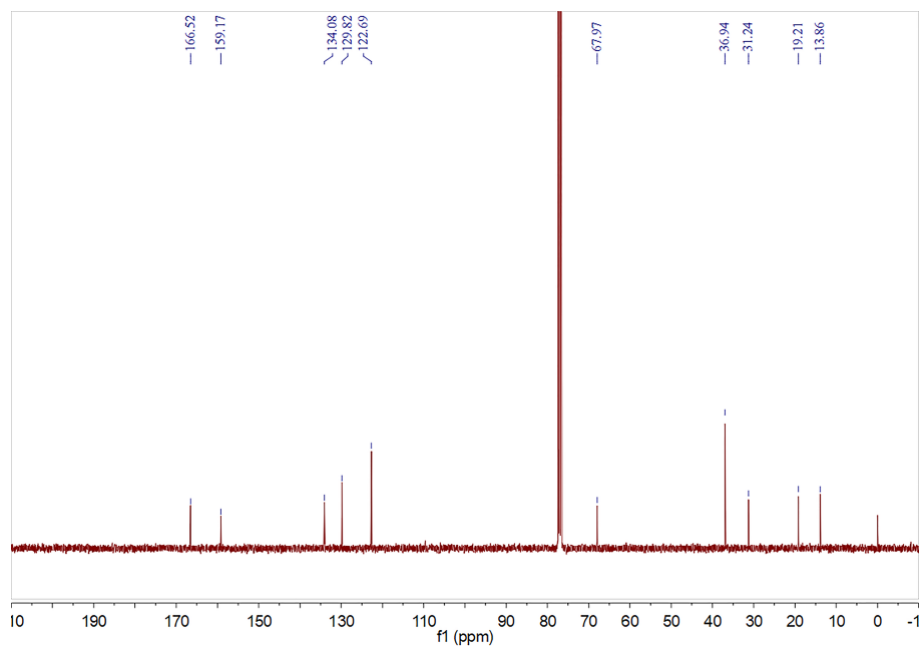

Fig. S9  $^{13}\text{C}$  NMR of  $S,S'$ -(5-butoxy-1,3-phenylene) bis(dimethylcarbamothioate) in  $\text{CDCl}_3$ .

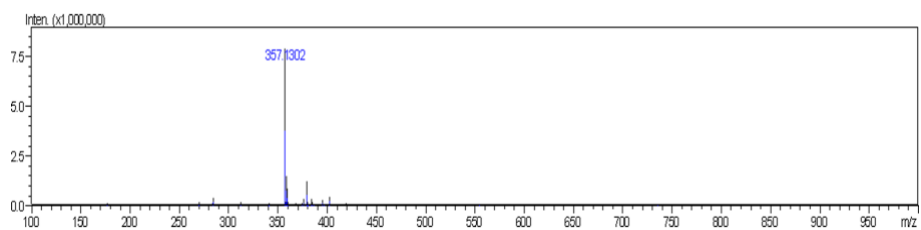

Fig. S10 High resolution mass spectrum of  $S,S'$ -(5-butoxy-1,3-phenylene) bis(dimethylcarbamothioate).

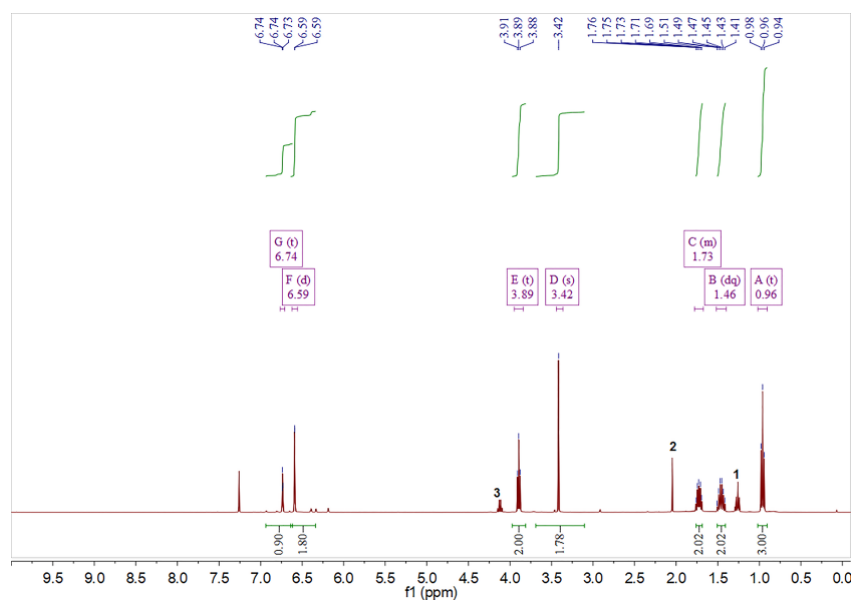

Fig. S11  $^1\text{H}$  NMR of 5-butoxybenzene-1,3-dithiol in  $\text{CDCl}_3$ , in which the peaks 1, 2, 3 are assigned to the residual solvent ethyl acetate.

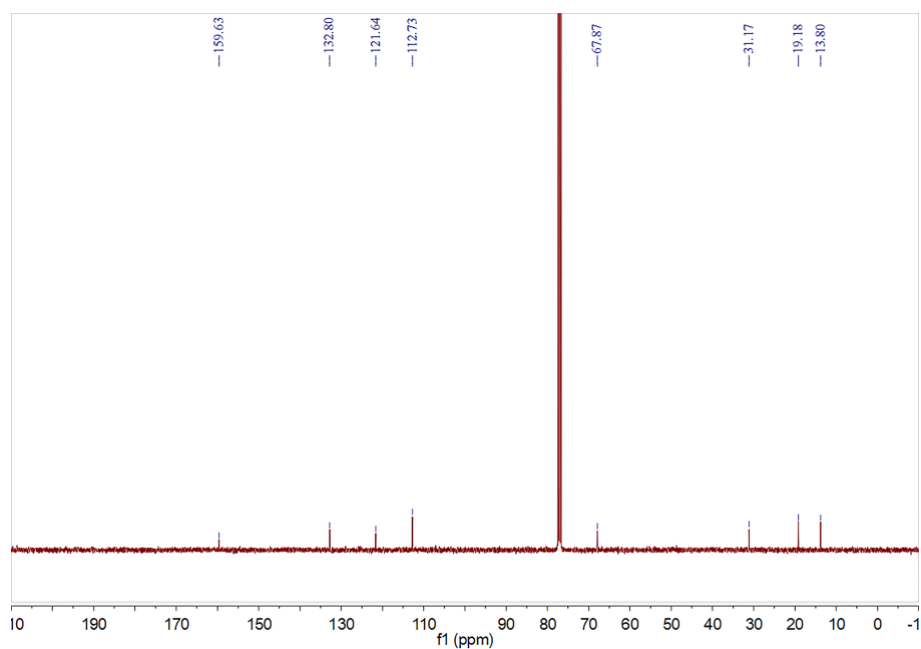

Fig. S12  $^{13}\text{C}$  NMR of 5-butoxybenzene-1,3-dithiol in  $\text{CDCl}_3$ .

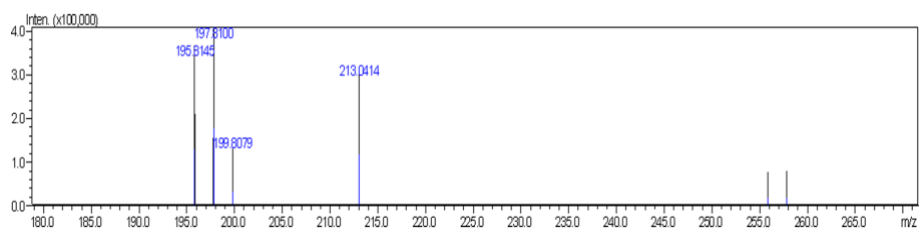

Fig. S13 High resolution mass spectra of 5-butoxybenzene-1,3-dithiol.

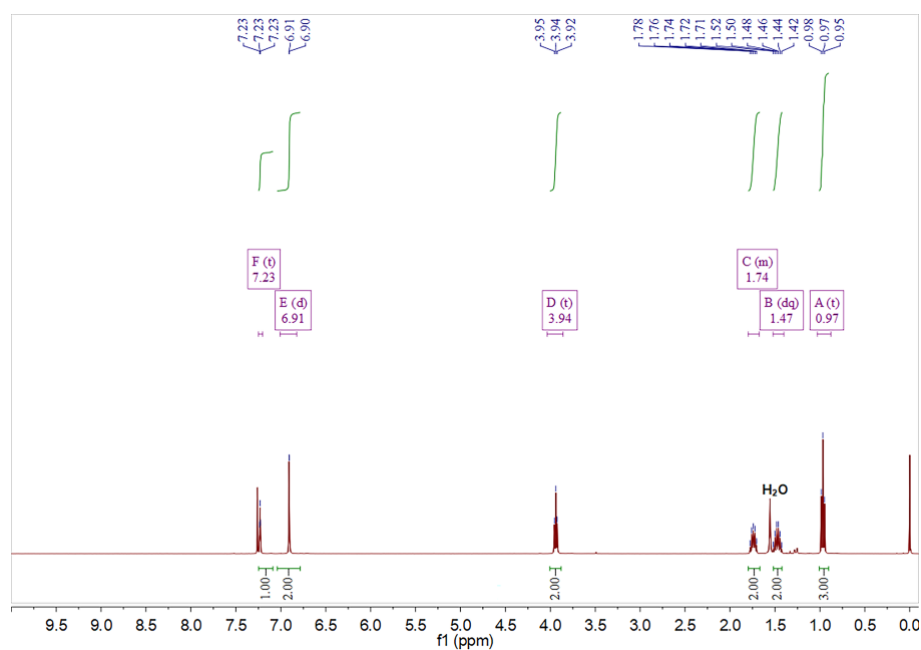

Fig. S14  $^1\text{H}$  NMR of the disulfide macrocycle (DSM) in  $\text{CDCl}_3$ .

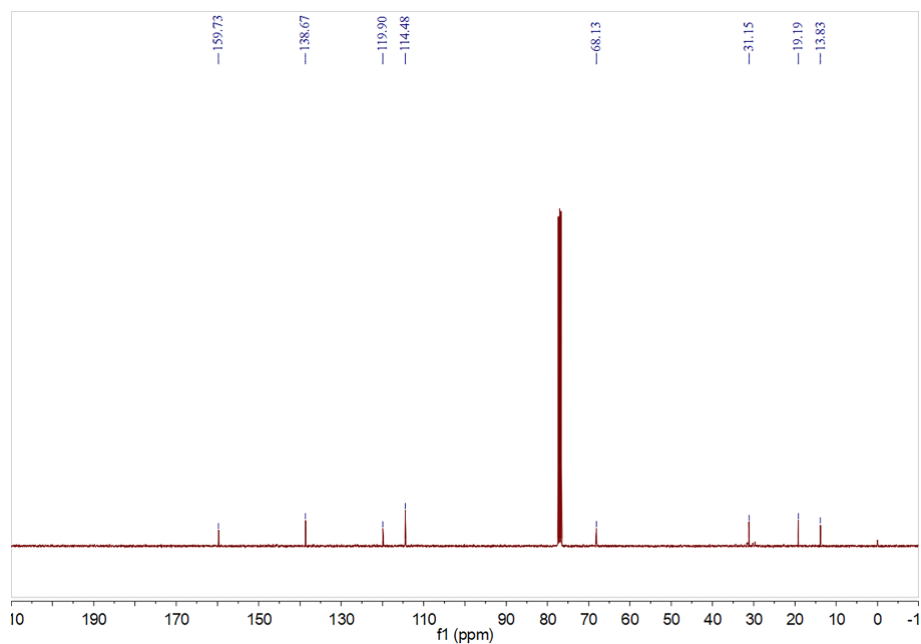

Fig. S15  $^{13}\text{C}$  NMR of the disulfide macrocycle (DSM) in  $\text{CDCl}_3$ .

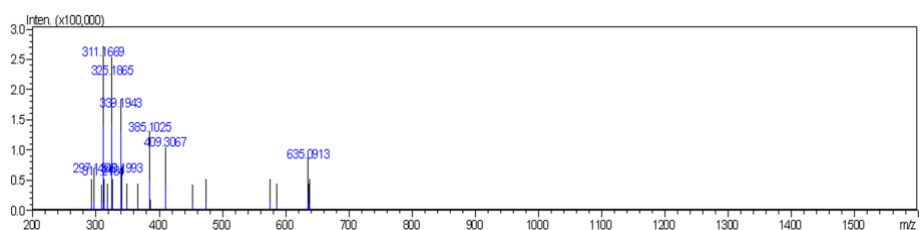

Fig. S16 High resolution mass spectrum of the disulfide macrocycle (DSM).

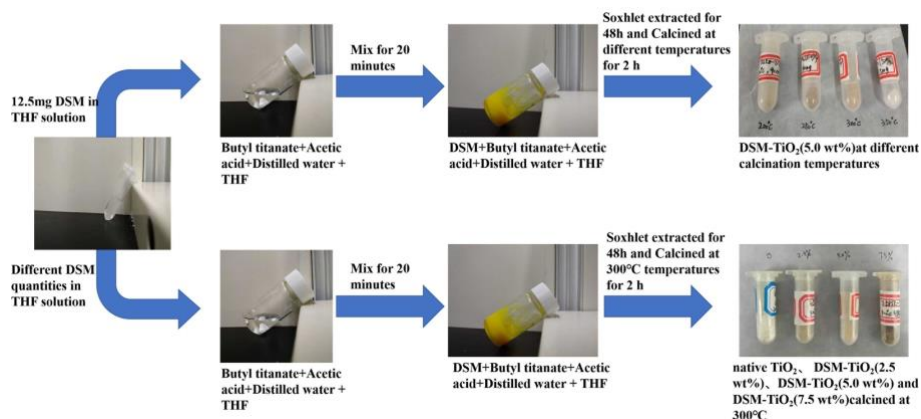

Fig. S17  $\text{DSM-TiO}_2(5.0 \text{ wt}\%)$  at different calcination temperatures and  $\text{DSM-TiO}_2$  with different DSM content (native  $\text{TiO}_2$ ,  $\text{DSM-TiO}_2(2.5 \text{ wt}\%)$ ,  $\text{DSM-TiO}_2(5.0 \text{ wt}\%)$ ,  $\text{DSM-TiO}_2(7.5 \text{ wt}\%)$ ) at  $300^\circ\text{C}$  were synthesized.

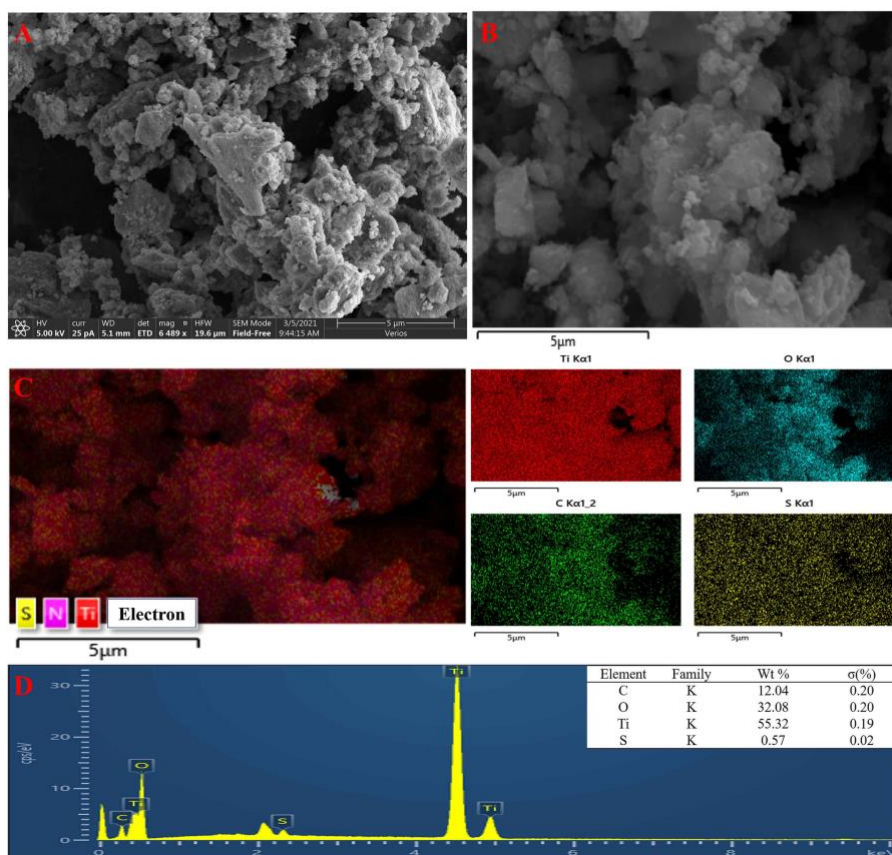

Fig. S18 (A) and (B) SEM, (C) the elemental mapping image, and (D) EDX analysis of DSM-TiO<sub>2</sub>(5.0 wt%).

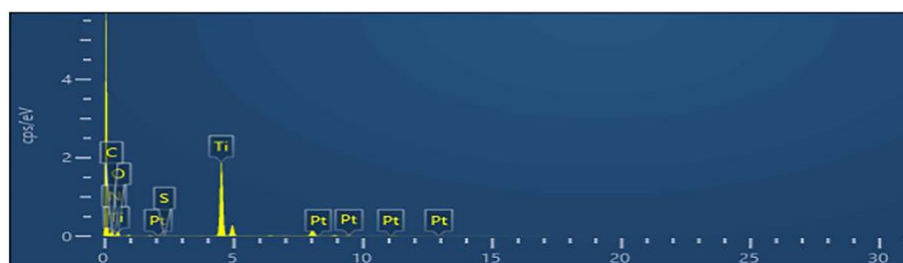

Fig. S19 The EDX analysis of the Pt/DSM-TiO<sub>2</sub>(5.0 wt%).



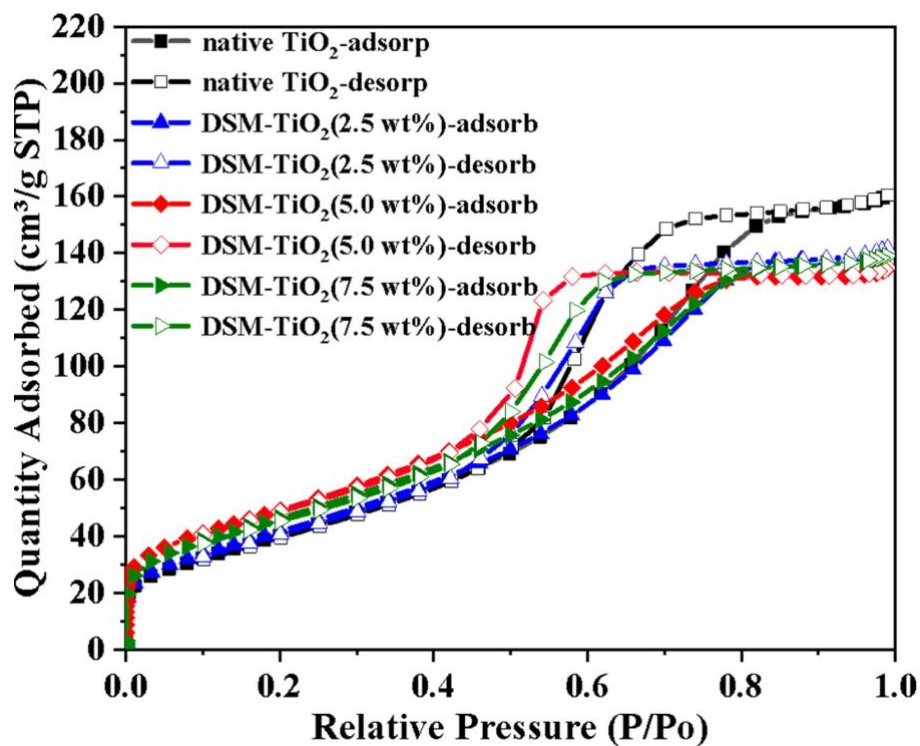

Fig. S20 The physical absorption and desorption measured at 77K of native  $\text{TiO}_2$  and  $\text{DSM-TiO}_2(2.5/5.0/7.5 \text{ wt}\%)$ .

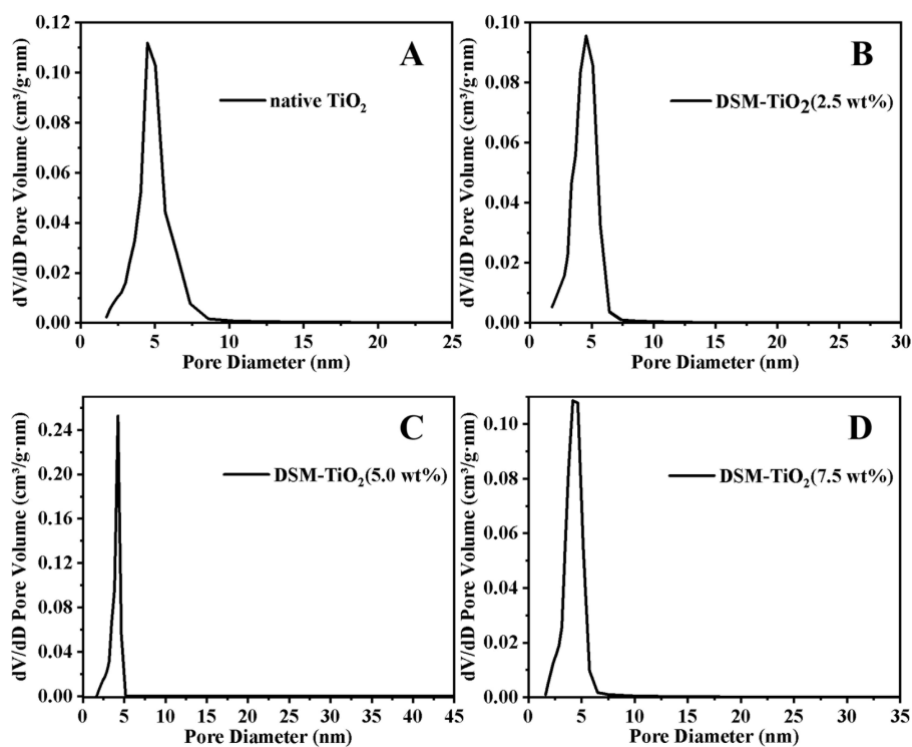

Fig. S21 Pore distribution of native  $\text{TiO}_2$  and  $\text{DSM-TiO}_2(2.5/5.0/7.5 \text{ wt}\%)$ .

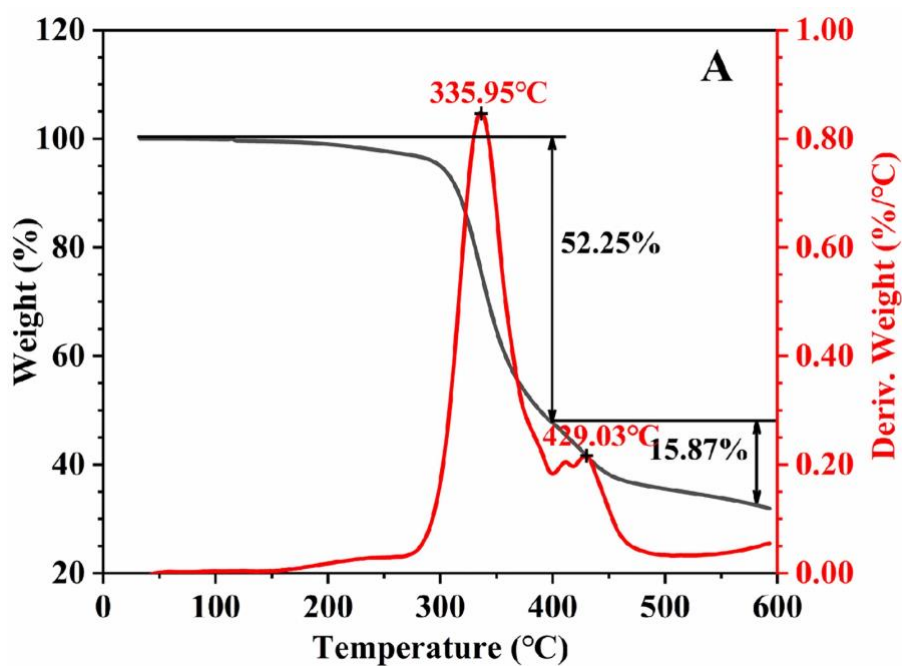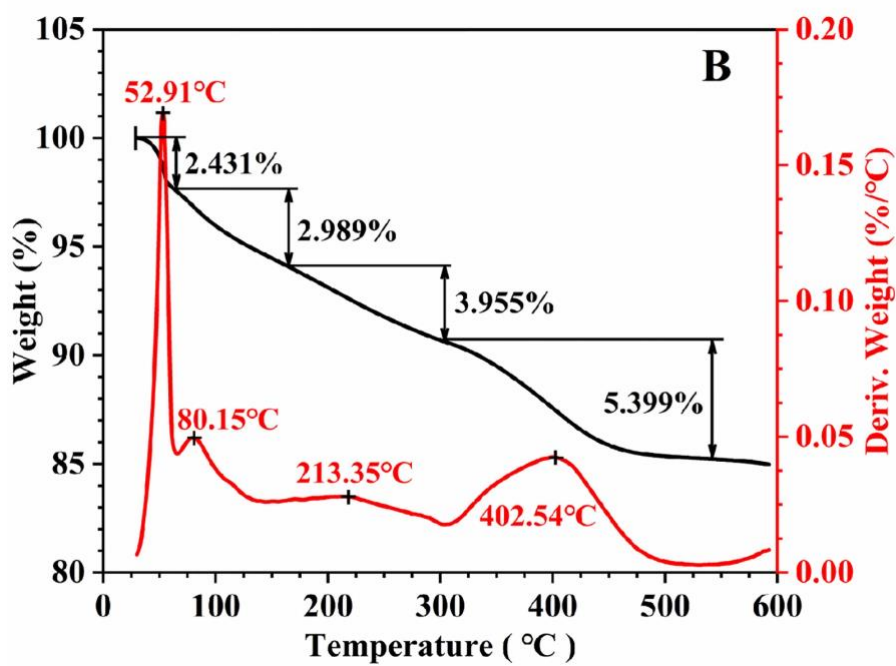

Fig. S22 Thermogravimetric analysis of (A) DSM and (B) DSM-TiO<sub>2</sub>(7.5 wt%) materials. The temperature gradient was from room temperature to 600°C at a heating rate at 10 °C/min.

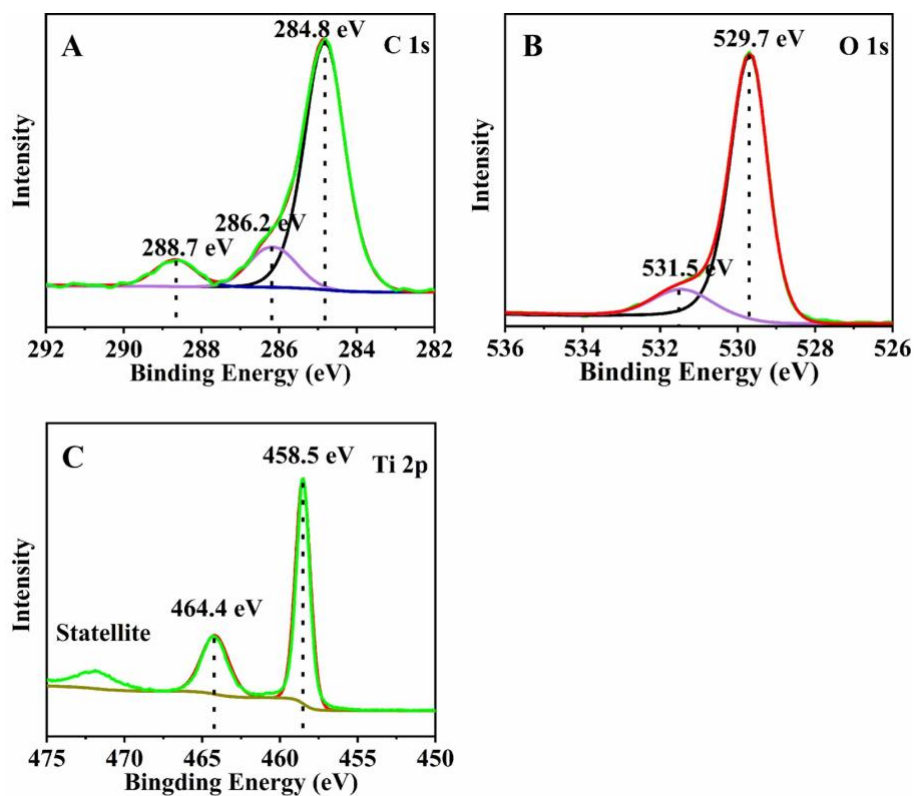

Fig. S23 X-ray photoelectron spectra for Ti and O of native TiO<sub>2</sub>. Atomic ratio of Ti : O = 36% : 63%  $\approx$  1 : 2.

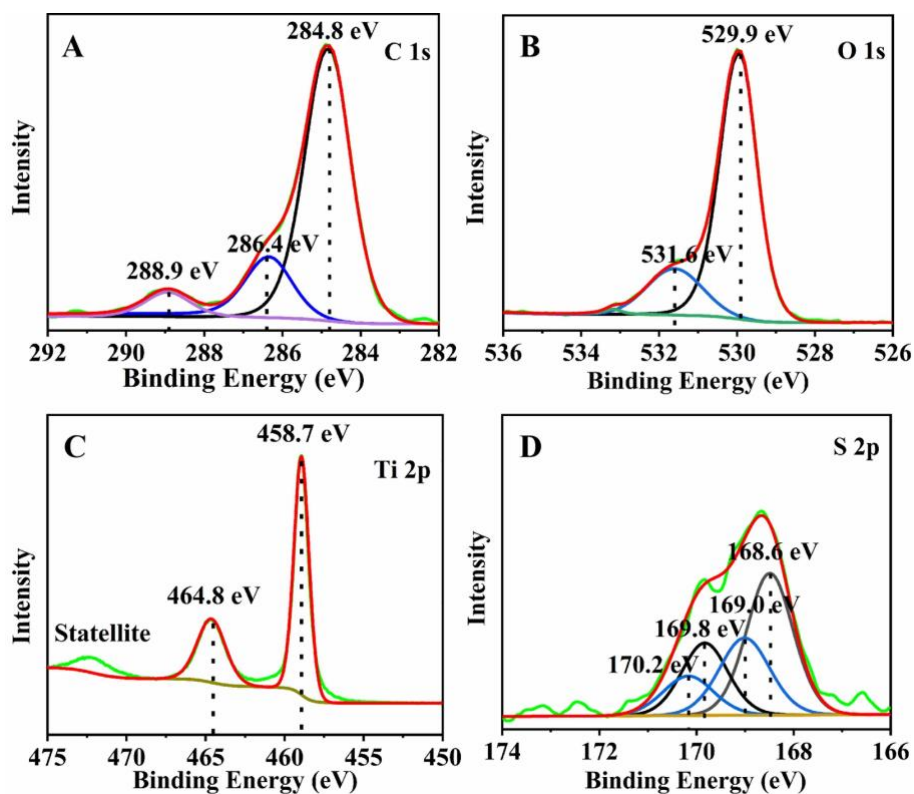

Fig. S24 X-ray photoelectron spectra for Ti, O and S of DSM-TiO<sub>2</sub>(5.0 wt%). The weight ratio of Ti : O : S = 50% : 36% : 2.0%; Atomic ratio of Ti : O = 25% : 53%  $\approx$  1 : 2.

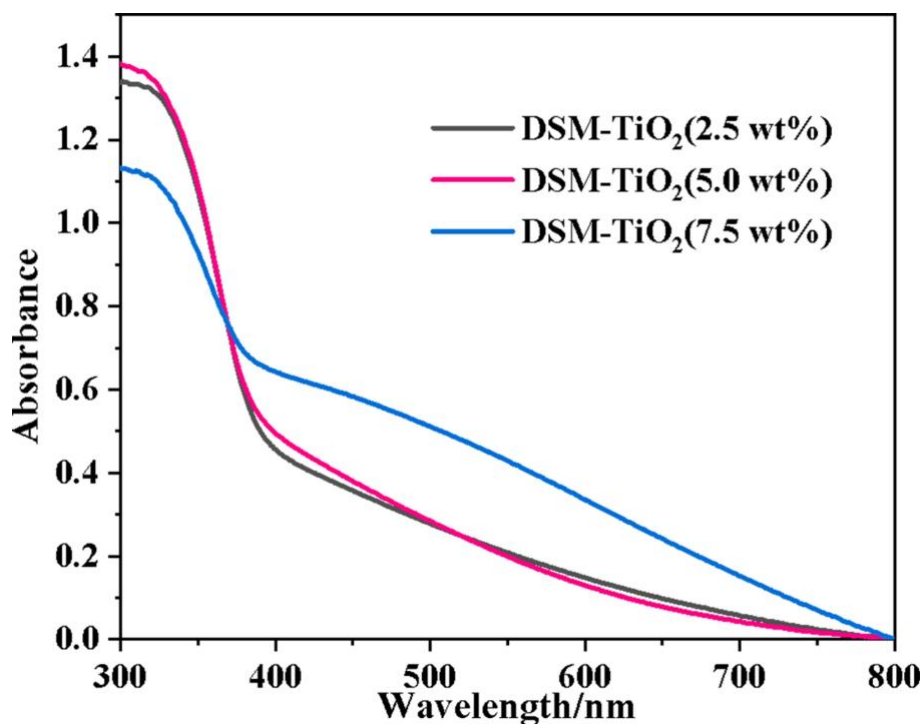

Fig. S25 The solid UV-vis spectrum of DSM-TiO<sub>2</sub>(2.5\5.0\7.5 wt%).

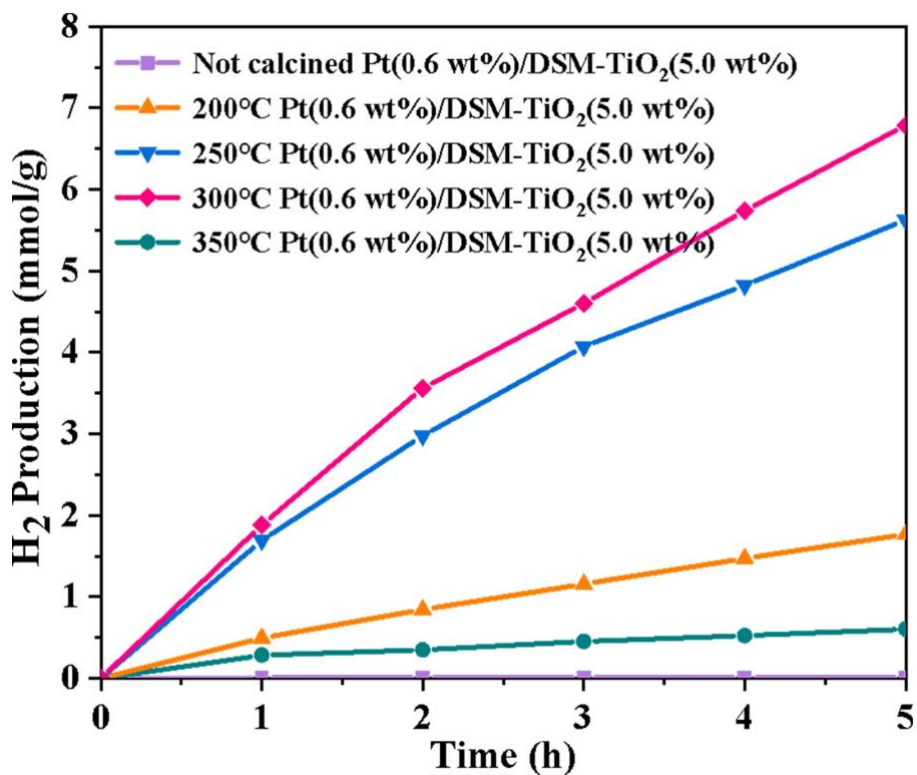

Fig. S26 Hydrogen production performance of DSM-TiO<sub>2</sub>(5.0 wt%) calcined at different temperatures.

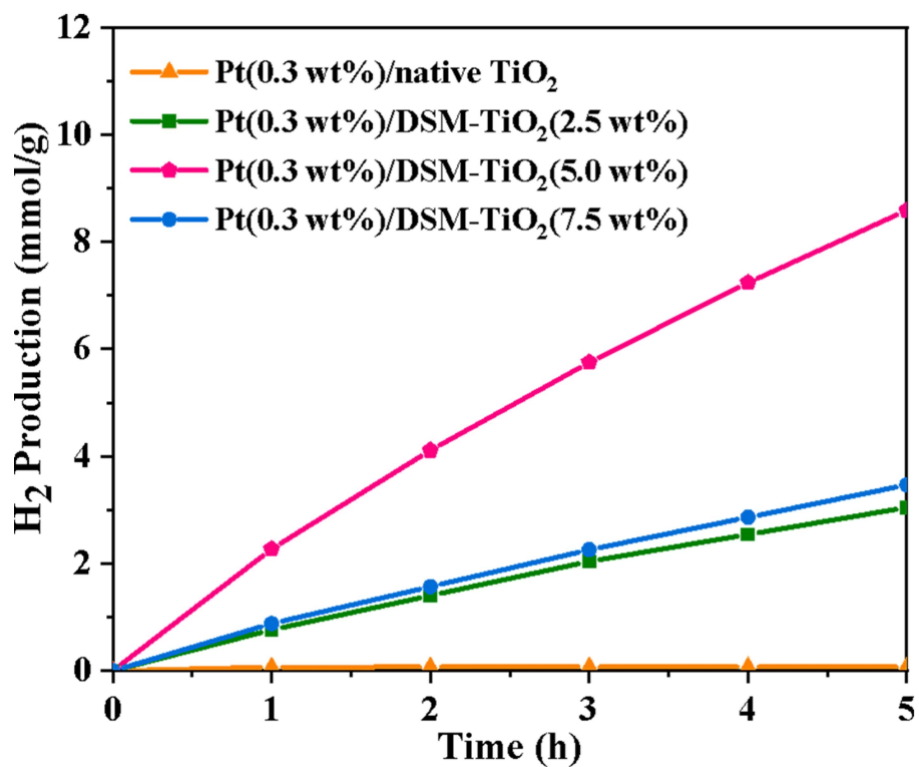

Fig. S27 Hydrogen production performance of DSM-TiO<sub>2</sub> with different dosages of DSM dopant.

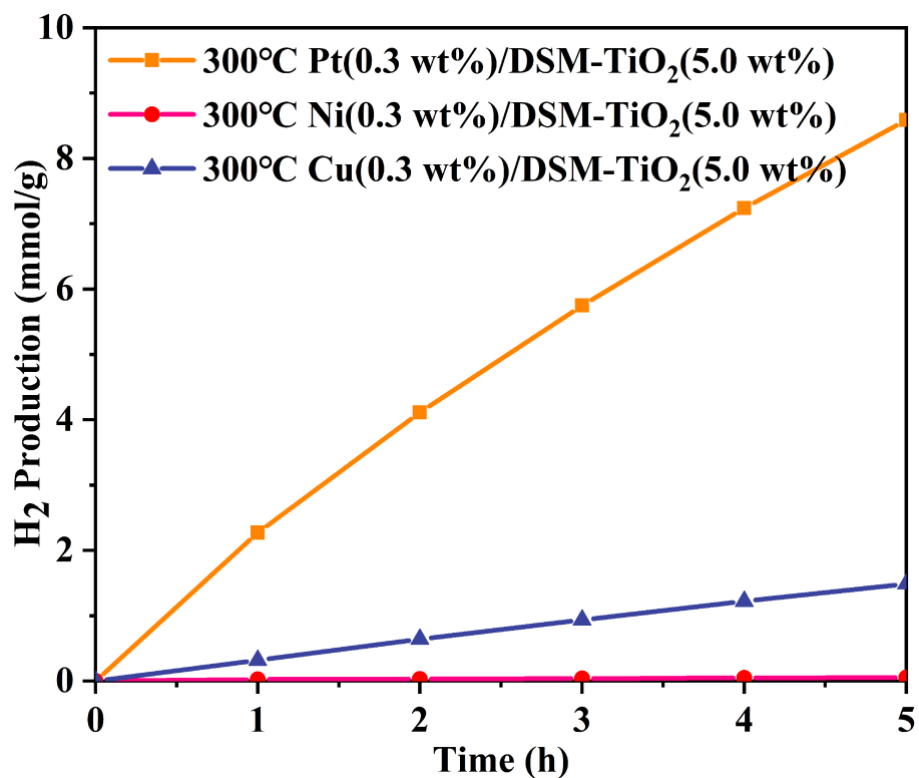

Fig. S28 Hydrogen production performance of DSM-TiO<sub>2</sub> with Pt, Ni and Cu.

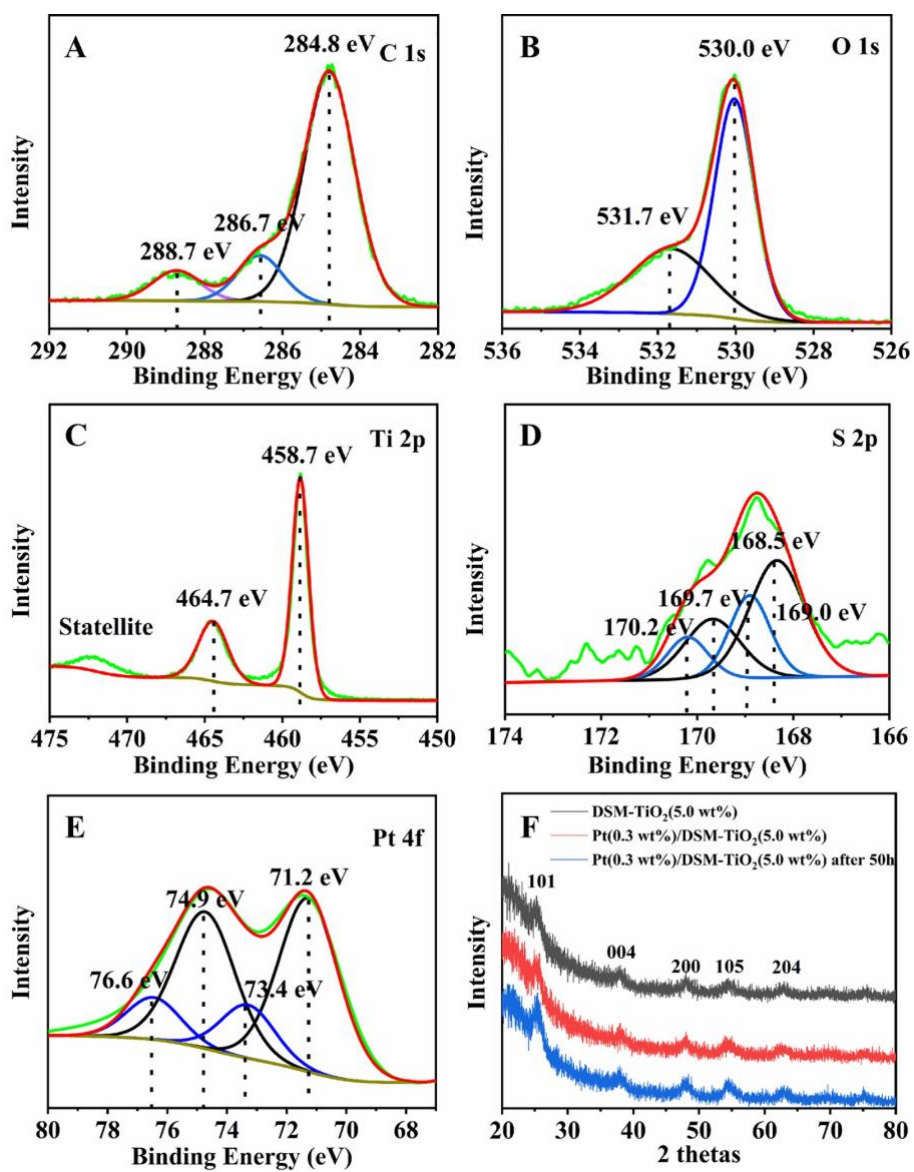

Fig. S29 XPS and XRD analysis of Pt(0.3 wt%)/DSM-TiO<sub>2</sub>(5.0 wt%) after the 50 hours' cycle stability experiment.

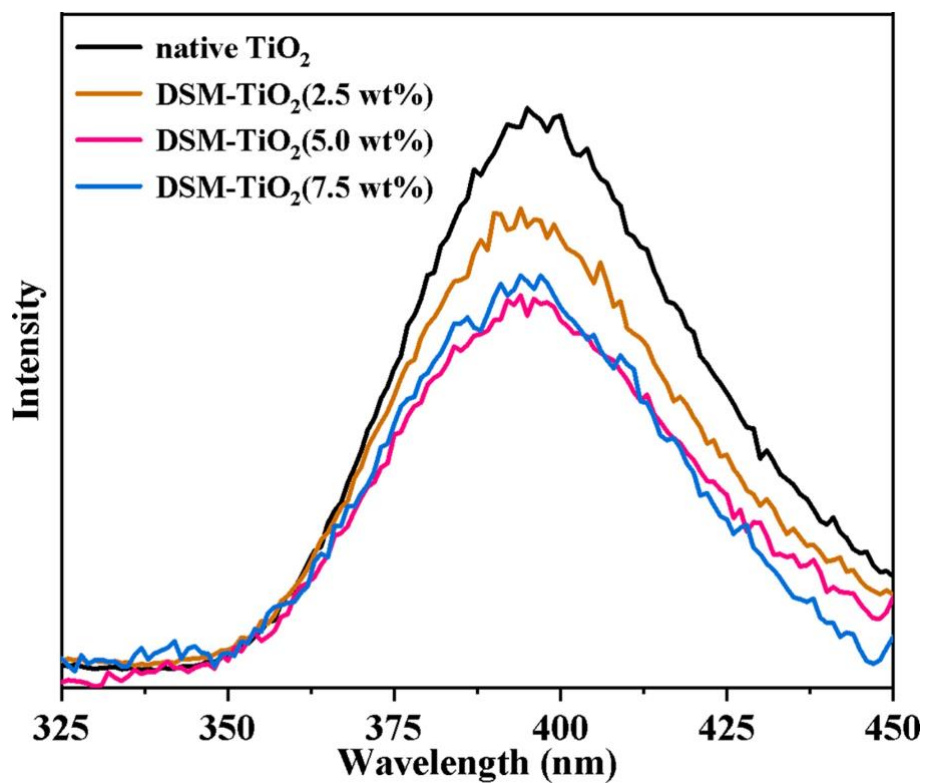

Fig. S30 Solid steady state fluorescence spectrum of native TiO<sub>2</sub> and DSM-TiO<sub>2</sub>(2.5/5.0/7.5 wt%).

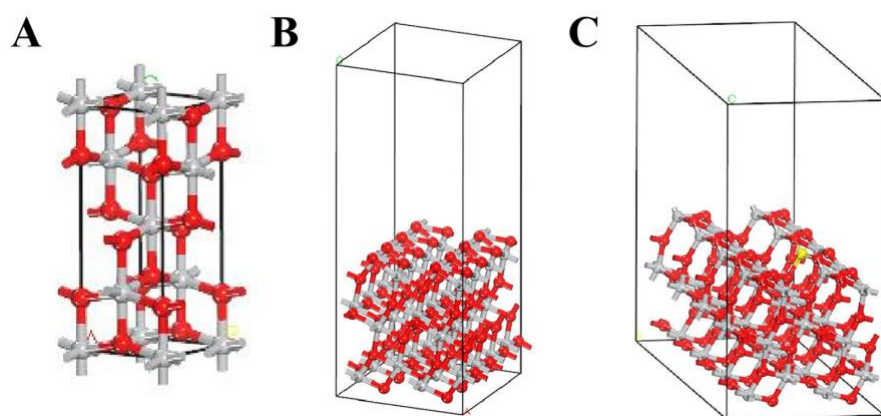

Fig. S31 Density Functional theory (DFT) computes the structural model: (A) Anatase TiO<sub>2</sub> cell, (B) Calculation model of anatase TiO<sub>2</sub>, (C) Calculation model of S-TiO<sub>2</sub>. Red is oxygen, silver is titanium, and yellow is sulfur.

Table. S1 Pt and S contents in DSM-TiO<sub>2</sub>(5.0 wt%) analysed by ICP-AES.

| Sample                                     | Pt content (wt%) |
|--------------------------------------------|------------------|
| Pt(0.3 wt%)/DSM-TiO <sub>2</sub> (5.0 wt%) | 0.3              |
| Pt(0.6 wt%)/DSM-TiO <sub>2</sub> (5.0 wt%) | 0.5              |
| Pt(1.0 wt%)/DSM-TiO <sub>2</sub> (5.0 wt%) | 0.8              |
| Pt(1.5 wt%)/DSM-TiO <sub>2</sub> (5.0 wt%) | 1.4              |
| Pt(2.0 wt%)/DSM-TiO <sub>2</sub> (5.0 wt%) | 2.0              |
| Sample                                     | S content (wt%)  |
| DSM-TiO <sub>2</sub> (5.0 wt%)             | 1.5              |

Table. S2 Specific surface area, pore size and pore volume of native TiO<sub>2</sub> and DSM-TiO<sub>2</sub> materials measured by adsorption isotherm at 77K.

| Sample                         | Surface area (m <sup>2</sup> /g) | Pore size (nm) | Pore volume (cm <sup>3</sup> /g) |
|--------------------------------|----------------------------------|----------------|----------------------------------|
| native TiO <sub>2</sub>        | 154.73                           | 4.80           | 0.252                            |
| DSM-TiO <sub>2</sub> (2.5 wt%) | 159.08                           | 5.40           | 0.219                            |
| DSM-TiO <sub>2</sub> (5.0 wt%) | 181.07                           | 3.91           | 0.216                            |
| DSM-TiO <sub>2</sub> (7.5 wt%) | 172.44                           | 4.20           | 0.221                            |

Table. S3 The apparent quantum yield of 20mg DSM-TiO<sub>2</sub>(5.0 wt%) material that was irradiated under 405 nm and 450 nm LED lamps for 1 hour respectively.

| Sample         | Pt(0.3 wt%)/DSM-TiO <sub>2</sub> (5.0 wt%) | Pt(0.3 wt%)/DSM-TiO <sub>2</sub> (5.0 wt%) |
|----------------|--------------------------------------------|--------------------------------------------|
| Wavelength(nm) | 405                                        | 450                                        |
| AQY            | 1.15                                       | 0.64                                       |
